# Supplementary material
Source: PubMed Central journal article supplement (PMC4100541)

Supplemental Figure 1. MGMT overexpression in 231-BR-EGFP cells increases sensitivity to temozolomide in vitro.

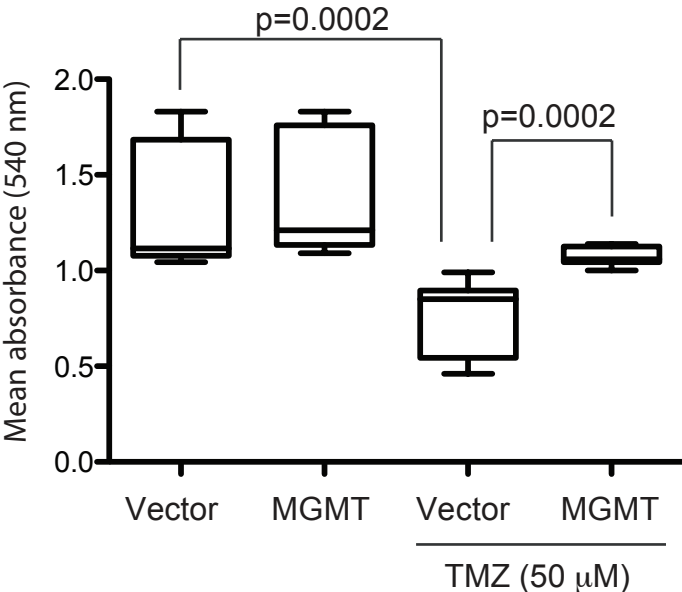

Supplement: NIHMS575606-supplement-3.pdf [file NIHMS575606-supplement-3.pdf]
