# Supplementary material
Source: PubMed Central journal article supplement (PMC4100541)

Supplemental Figure 2. MGMT expression status in Jimt-1-Br3 cells predicts sensitivity to temozolomide.

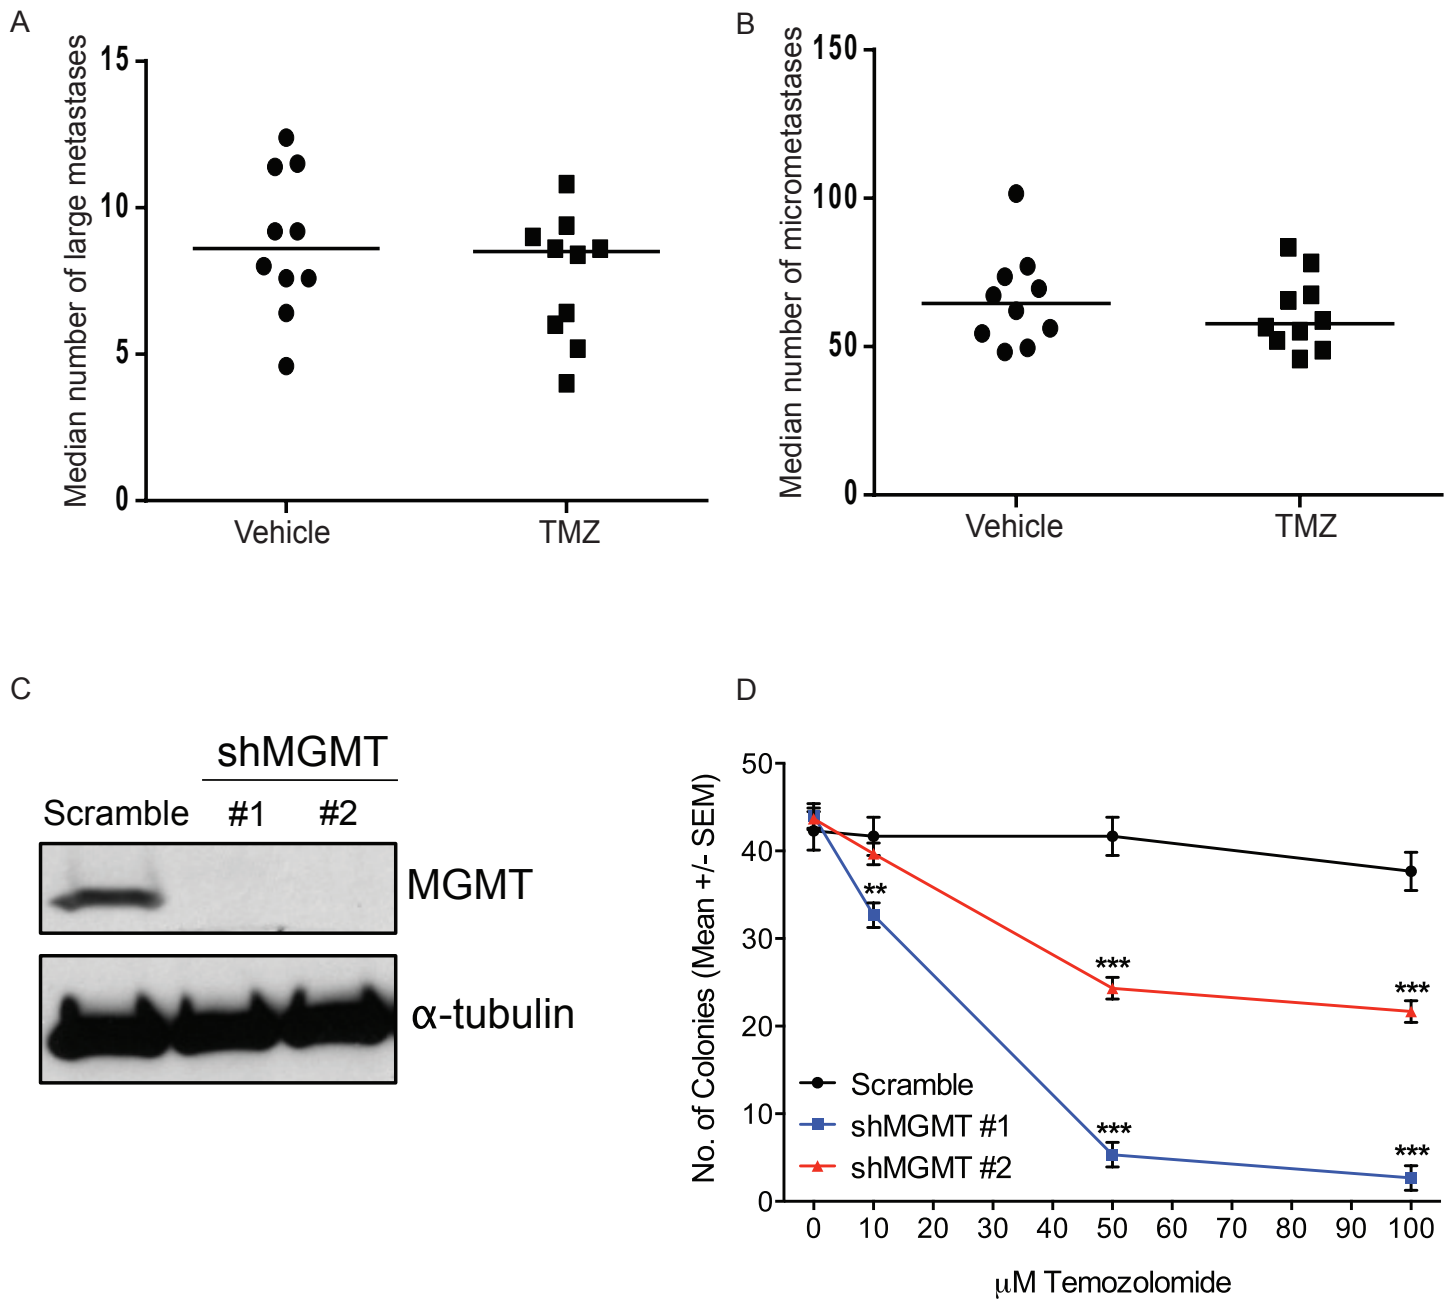

Supplement: NIHMS575606-supplement-4.pdf [file NIHMS575606-supplement-4.pdf]
