# Supplementary material
Source: PubMed Central journal article supplement (PMC4100541)

Supplemental Figure 3. MGMT expression in matched sets of human breast primary tumors and resected brain metastases does not affect overall patient survival.

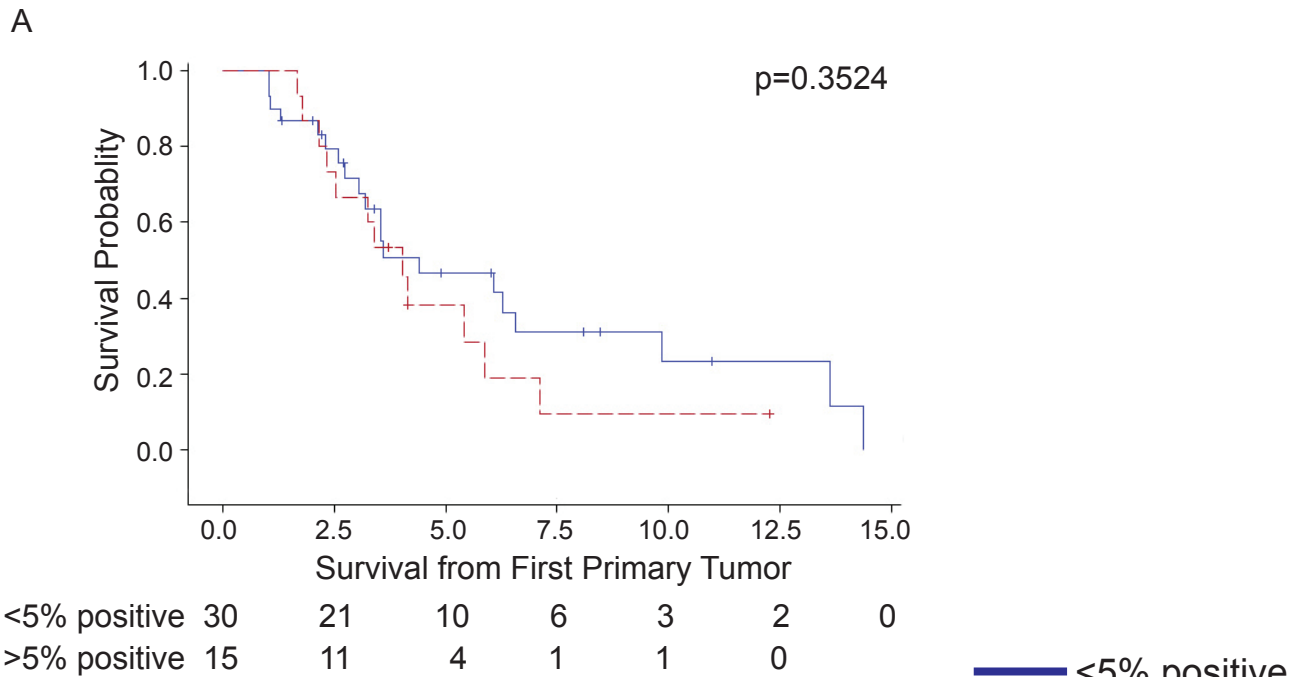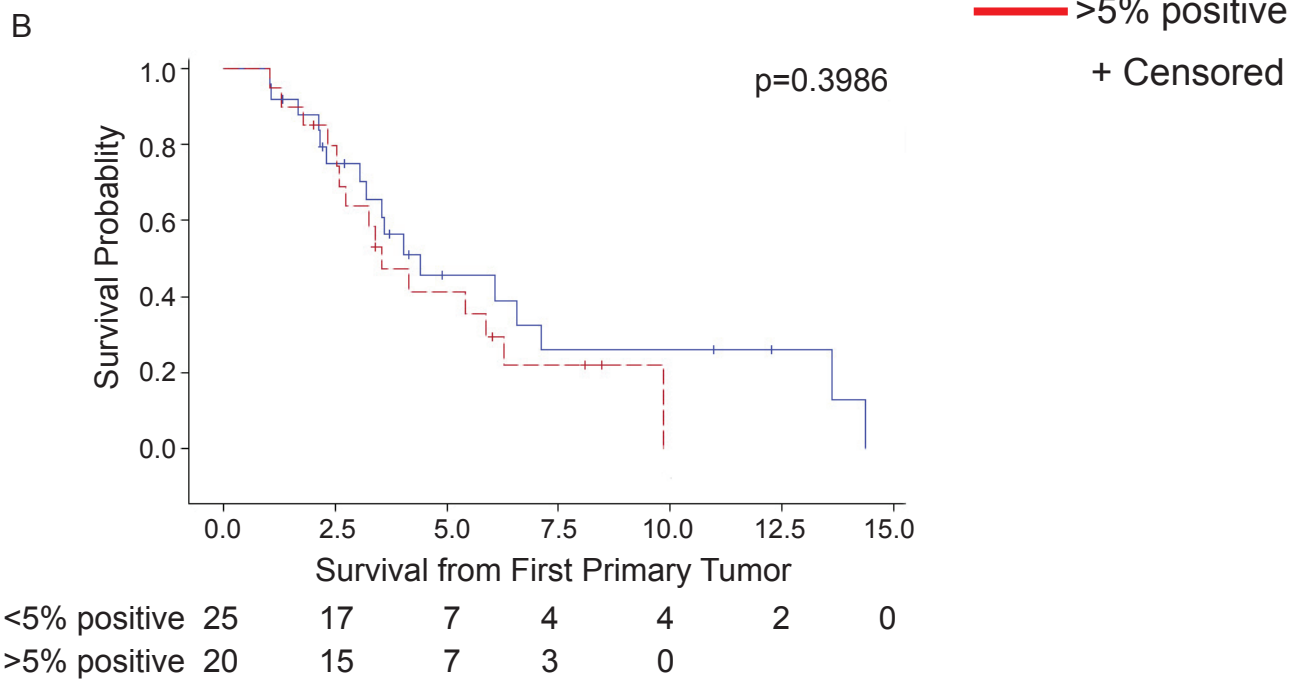

Supplement: NIHMS575606-supplement-5.pdf [file NIHMS575606-supplement-5.pdf]
